# Supplementary material for: Probiotic of Lactiplantibacillus plantarum NWAFU-BIO-BS29 Isolated from Chinese Traditional Fermented Milk and Its Potential Therapeutic Applications Based on Gut Microbiota Regulation
Source: MDPI journal article supplement (doi:10.3390/foods11233766), 2022-11-23
Supplement: s1 [file s1]

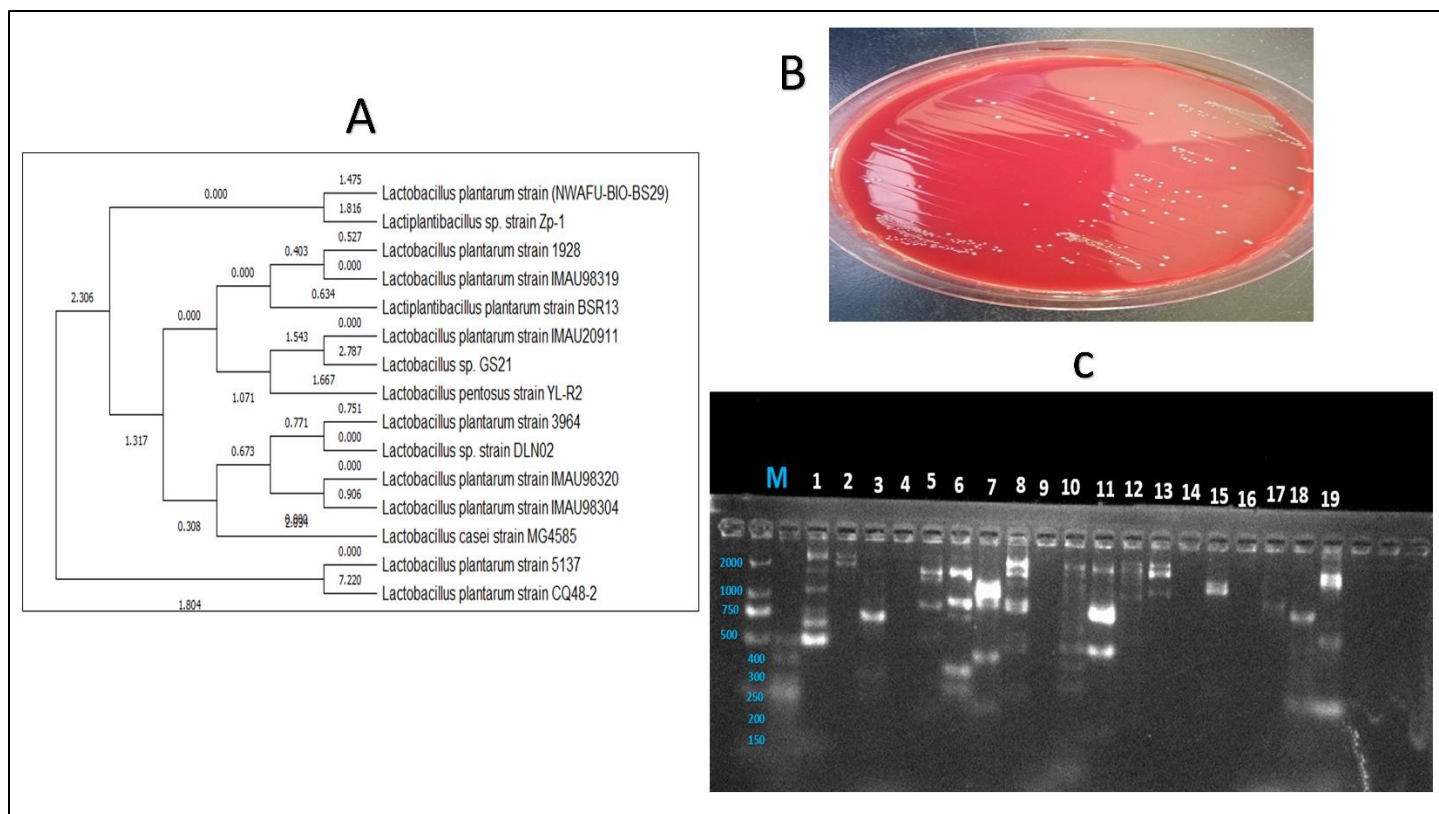

**Figure S1. A.** Neighbour-joining of the Phylogenetic tree based on 16S rRNA gene sequence. **B.** Haemolysis activity. **C.**

Detection of the presence of 16 genes related to virulence, biogenic amines, and antibiotic resistance.

**Note:** Evolutionary analysis was conducted in MEGA11 by Maximum Likelihood method. The evolutionary history was inferred by the Maximum Likelihood method and Hasegawa-Kishino-Yano model. The tree with the highest log likelihood (-28887.05) is shown. Initial tree for the heuristic search were obtained automatically by applying Neighbor-Join and BioNJ algorithms to a matrix of pairwise distances estimated using the Maximum Composite Likelihood (MCL) approach and then select the topology with superior log likelihood value. ([www.megasoftware.net](http://www.megasoftware.net)).

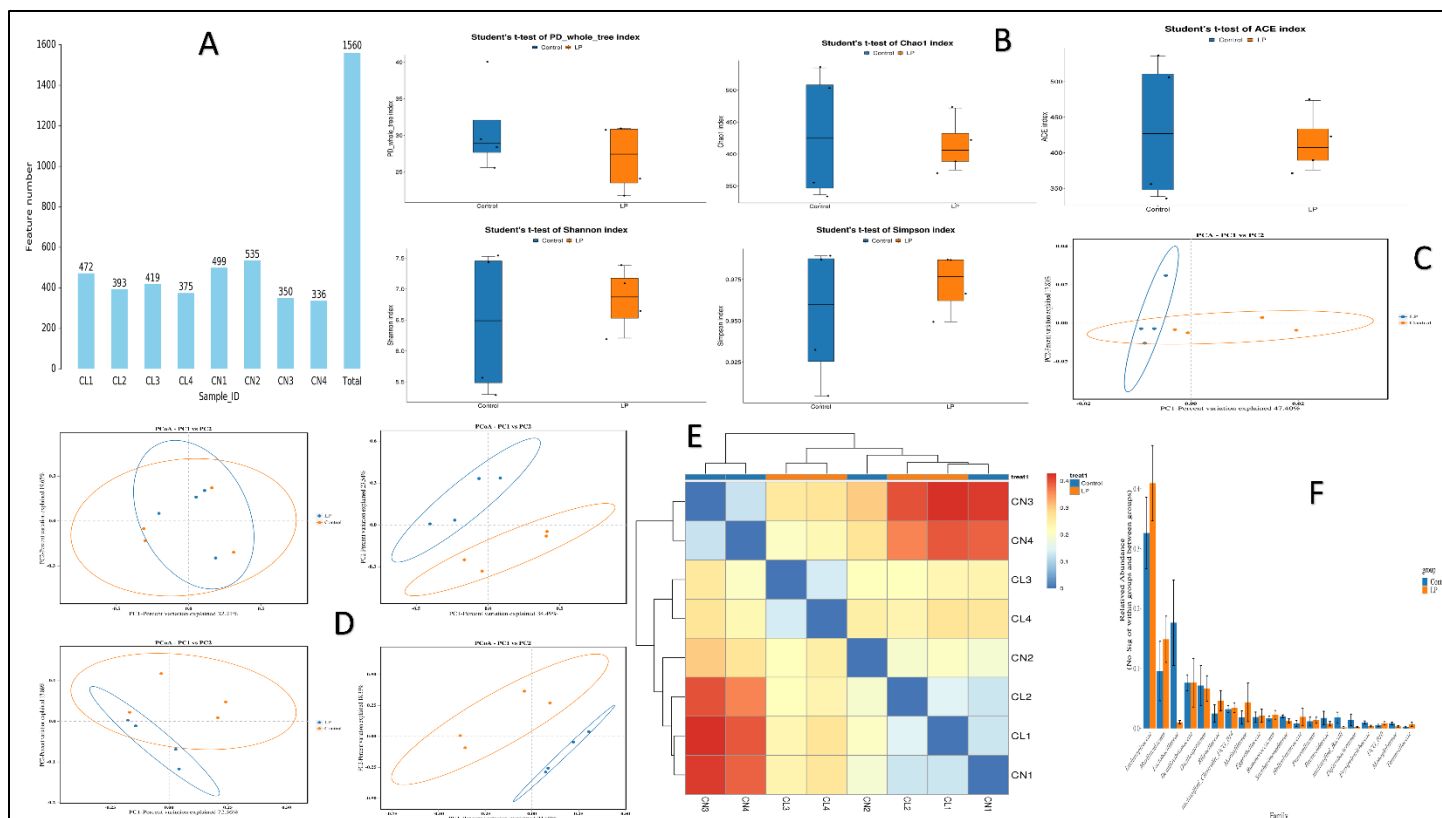

**Figure S2. A;** the real species in samples. **B;** Boxplot of the difference between groups. **C;** PCA. **D;** (PCoA) analysis plot. **E;** heatmap phylogenetic species tree. **F;** ANOVA analysis.

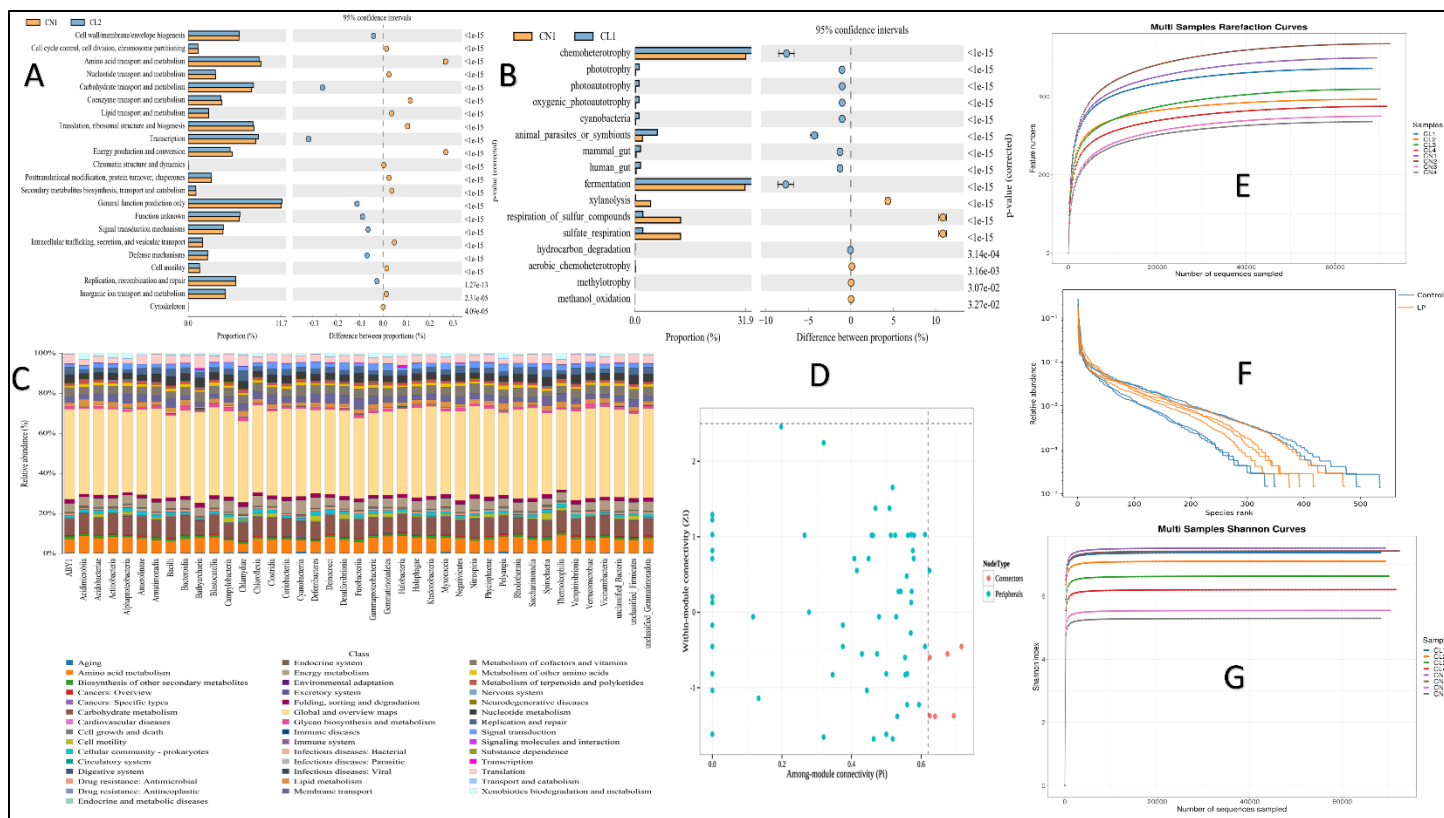

**Figure S3. A;** function classification chart. **B;** FAPROTAX. **C;** diagram of KEGG metabolic pathway. **D;** Node Zi-Pi distribution diagram. **E;** samples dilution curve. **F;** samples Shannon Index curve. **G;** samples rank-abundance curve.

**Table S1.** Primers sequences of virulence genes were used to detect by PCR.

| No | Target gene                      | Primers                        |
|----|----------------------------------|--------------------------------|
| 1  | <i>fsrA-F</i>                    | ATGAGTGAACAAATGGCTATTTA        |
|    | <i>fsrA-R</i>                    | CTAAGTAAGAAATAGTGCCTTGA        |
| 2  | <i>asa1-F</i>                    | GCACGCTATTACGAACCTATGA         |
|    | <i>asa1-R</i>                    | TAAGAAAGAACATCACCACGA          |
| 3  | <i>efaA-F</i>                    | GCCAATTGGGACAGACCCTC           |
|    | <i>efaA-R</i>                    | CGCCTTCTGTTCTTCTTTGGC          |
| 4  | <i>cpd-F</i>                     | TGGTGGGTTATTTTTCAATTC          |
|    | <i>cpd-R</i>                     | TACGGCTCTGGCTTACTA             |
| 5  | <i>hyl-F</i>                     | ACAGAAGAGCTGCAGGAAATG          |
|    | <i>hyl-R</i>                     | GACTGACGTCCAAGTTTCCAA          |
| 6  | <i>mur-2ed-F</i>                 | AACAGCTTACTTGACTGGACGC         |
|    | <i>mur-2ed-R</i>                 | GTATTGGCGCTACTACCCGTATC        |
| 7  | <i>Int-F</i>                     | GCGTGATTGTATCTCACT             |
|    | <i>Int-R</i>                     | GACGCTCCTGTTGCTTCT             |
| 8  | <i>tdc-F</i>                     | GAYATNATNGGNATNGGNYTNGAYCARG   |
|    | <i>tdc-R</i>                     | CCRTARTCNNGNATAGCRAARTCNNGTRTG |
| 9  | <i>odc-F</i>                     | GTNTTYAAYGCNGAYAARCANTAYTTYGT  |
|    | <i>odc-R</i>                     | ATNGARTTNAGTTCRCAYTTYTCNGG     |
| 10 | <i>hdc1-F</i>                    | AGATGGTATTGTTTCTTATG           |
|    | <i>hdc1-R</i>                    | AGACCATAACCCATAACCTT           |
| 11 | <i>aac(6')-Ie-aph(2'')-Ia- F</i> | CCAAGAGCAATAAGGGCATA           |
|    | <i>aac(6')-Ie-aph(2'')-Ia- R</i> | CACTATCATAACCACTACCG           |
| 12 | <i>vanC2-F</i>                   | CTCCTACGATTCTCTTG              |
|    | <i>vanC2-R</i>                   | CGAGCAAGACCTTTAAG              |
| 13 | <i>ermA-F</i>                    | TCTAAAAAGCATGTAAAAGAA          |
|    | <i>ermA-R</i>                    | CTTCGATAGTTTATTAATATTAG        |
| 14 | <i>tet(K)-F</i>                  | TTAGGTGAAGGGTTAGGTCC           |
|    | <i>tet(K)-R</i>                  | GCAAACCTCATTCCAGAAGCA          |
| 15 | <i>catA-F</i>                    | GGATATGAAATTTATCCCTC           |
|    | <i>catA-R</i>                    | CAATCATCTACCCTATGAAT           |
| 16 | <i>vat(E)-F</i>                  | ACGTTACCCATCACTATG             |
|    | <i>vat(E)-R</i>                  | GCTCCGATAATGGCACCGAC           |
| 17 | <i>ant(6)-Ia-F</i>               | ACTGGCTTAATCAATTTGGG           |
|    | <i>ant(6)-Ia-R</i>               | GCCTTTCCGCCACCTCACCG           |

**Table S2:** Antibiotic classification, MIC (mg/ml) profiles to inhibit LAB strains, and susceptibility type.

| Antibiotic classification [3] | Antibiotic      | Cut-off values (mg/L) | Susceptibility type |
|-------------------------------|-----------------|-----------------------|---------------------|
| Aminoglycoside                | Kanamycin       | 64                    | S                   |
|                               | Gentamycin      | 16                    | S                   |
| Beta-lactams                  | Ampicillin      | 2                     | S                   |
| Protein synthesis inhibitor   | Tetracycline    | 32                    | S                   |
| Cyclic peptides               | Streptomycin    | n.r.                  | S                   |
| Glycopeptide                  | Vancomycin      | n.r.                  | S                   |
| Macrolides                    | Erythromycin    | 1                     | S                   |
| Amphenicols                   | Chloramphenicol | 8                     | S                   |

Note: (n.r.) not required, (S) Sensitive, (R) resistant, (I) intermediate to the antibiotics tested.

3 Zheng, Z.-Y.; Cao, F.-W.; Wang, W.-J.; Yu, J.; Chen, C.; Chen, B.; Liu, J.-X.; Firman, J.; Renye, J.; Ren, D.-X. Probiotic characteristics of *Lactobacillus plantarum* E680 and its effect on Hypercholesterolemic mice. *BMC Microbiol.* **2020**, *20*, 239. <https://doi.org/10.1186/s12866-020-01922-4>.

**Table S3:** Detection of 16 (VFs) genes related to virulence, biogenic amines, and antibiotic resistance.

|                                        | <b>Genes</b>                  | <b>Result</b> |
|----------------------------------------|-------------------------------|---------------|
| <b>1. Virulence</b>                    |                               |               |
| gelatinase                             | <i>fsrA</i>                   | ○             |
| aggregation                            | <i>asa1</i>                   | ○             |
| endocarditis                           | <i>efaA</i>                   | ○             |
| chemotactic factors                    | <i>cpd</i>                    | ○             |
| hyaluronidase                          | <i>hyl</i>                    | ○             |
| Enterococcus factors (surface protein) | <i>mur-2ed</i>                | ○             |
| <b>2. Biogenic amines</b>              |                               |               |
| tyrosine                               | <i>tdc</i>                    | ○             |
| ornithine                              | <i>odc</i>                    | ○             |
| histidine                              | <i>hdc1</i>                   | ○             |
| <b>3. Antibiotic resistance</b>        |                               |               |
| aminoglycosides gentamicin             | <i>aac(6')-Ie-aph(2'')-Ia</i> | ○             |
| glycopeptides vancomycin               | <i>vanC2</i>                  | ○             |
| macrolides erythromycin                | <i>ermA</i>                   | ○             |
| tetracyclines tetracycline             | <i>tet(K)</i>                 | ○             |
| other chloramphenicol                  | <i>catA</i>                   | ○             |
| streptogramin                          | <i>vat(E)</i>                 | ○             |
| streptomycin                           | <i>ant(6)-Ia</i>              | ○             |

Note ○; Not detect, ■; Detect.

**Table S4:** Statistics of sample sequencing data processing results

| Sample ID | Raw Reads | Clean Reads | Denoised Reads | Merged Reads | Non-chimeric Reads |
|-----------|-----------|-------------|----------------|--------------|--------------------|
| CL1       | 80291     | 79965       | 79636          | 73572        | 68483              |
| CL2       | 80074     | 79778       | 79507          | 75012        | 69456              |
| CL3       | 80199     | 79907       | 79685          | 74127        | 70239              |
| CL4       | 79964     | 79708       | 79557          | 75070        | 71651              |
| CN1       | 80220     | 79901       | 79675          | 73943        | 69551              |
| CN2       | 79690     | 79391       | 79007          | 74867        | 72606              |
| CN3       | 80280     | 80013       | 79797          | 75941        | 70559              |
| CN4       | 79919     | 79648       | 79499          | 75095        | 68382              |

Note: The length distribution plot counts the number of sequences in the corresponding length range in each sample after quality control filtering.

**Table S5:** Distribution table of the number of characteristics of each sample

| BMK_ID | OTU_Num | Seqs_Num |
|--------|---------|----------|
| CL1    | 472     | 68294    |
| CL2    | 393     | 69301    |
| CL3    | 419     | 70133    |
| CL4    | 375     | 71555    |
| CN1    | 499     | 69320    |
| CN2    | 535     | 72429    |
| CN3    | 350     | 70473    |
| CN4    | 336     | 68313    |

Note: (1) BMK\_ID: sample number. (2) OTU\_Num: Number of Features (OTU/ASV). (3) Seqs\_Num: Feature corresponds to the number of reads.
